# Supplementary material
Source: publisher figshare collection journal article supplement (https://gsapubs.figshare.com/ndownloader/files/23293868)
Supplement: Supplementary file 1 [file 23293868]

**Microbial nucleation of Mg-rich dolomite in exopolymeric substances (EPS) under anoxic modern seawater salinity: New insight into an old enigma**

**Data Repository**

**Microorganism**

*Desulfobulbus mediterraneus* strain 86FS1 is a gram-negative, chemoorganotrophic and strictly anaerobic bacterium (Sass et al., 2002). Growth temperature ranges from 10 to 30°C with an optimum at 25°C. The strain was isolated from deep-sea sediment (1268 m water depth, bottom water temperature 15°C) off the NE Spanish coast (Sass et al., 2002).

**Culture medium**

The experiments were conducted using an anoxic synthetic seawater medium (Medium 196, German Collection of Microorganisms and Cell Cultures) using Na-lactate as organic substrate. The concentration of magnesium and calcium were adjusted to 15.2 and 3 mmol l<sup>-1</sup>, representing a modern seawater Mg/Ca molar ratio of 5. Medium headspace was gassed with 90% N<sub>2</sub>, 10% CO<sub>2</sub> to remove oxygen. 200 µl resazurin solution was added as an indicator for oxygen contamination. After sterilizing under 90% N<sub>2</sub>, 10% CO<sub>2</sub> atmosphere at 121°C for 20 minutes, the pH was adjusted to 7.4 with 0.1 M NaOH. pH was measured using a Schott Lab 850 pH meter, which was calibrated using NIST standards for pH 4.01, 6.87 and 9.18. The medium was transferred anaerobically into 50 ml serum vials with 90% N<sub>2</sub>, 10% CO<sub>2</sub> headspace. The medium was kept in the dark until further use. Light microscopy observations did not show precipitation of carbonate material after several weeks.

Medium pH, alkalinity and sulfide concentration

During the 14 day incubation period pH changed from 7.4 to 7.8. Corresponding total alkalinity was measured by sample aliquot titration with 0.01 molar HCl and methyl

red/methylene blue indicator under N<sub>2</sub> ventilation in a vessel after Pavlova. IAPSO standard seawater was used for calibration. During 14 day incubations total alkalinity changed from 59 to 80 mEq. Total sulfide concentration was determined photometrically at a wavelength of 480 nm (Cord-Ruwisch, 1985). Sulfide concentrations increased from 1.2 to 8 mmol l<sup>-1</sup> during 14 day incubations. The initial and final carbonate alkalinity was calculated with the following formula (1):

$$[CA] = [TA] - [HS^-] - [OH^-] + [H^+] \quad (1)$$

Calculations were performed according to Zeebe (2007).

### **Growing biofilms on glass slides**

3 ml of active *D. mediterraneus* culture was inoculated into a vial containing 50 ml of sterile, anoxic medium 196. The vial was transferred into a glove box and opened under 90% N<sub>2</sub>, 10% CO<sub>2</sub> atmosphere. A sterilized microscopy glass slide was placed on the opening of the vial and fixed with tape. Subsequently, the vial was turned upside and stored in the dark. According to the resazurin indicator samples remained anoxic during the entire experiment. After 3 and 14 days glass slides were carefully removed. The apparent biofilm was rinsed carefully in 1x phosphate buffered saline (PBS), and excess liquid was removed. Control experiments with sterile medium did not show precipitates.

### **Confocal laser scanning microscopy (CLSM)**

*D. mediterraneus* biofilms growth on glass slides were investigated with CLSM the same day the anoxic culture experiments were stopped. Lectin, a constituent of extracellular polymeric substances (EPS) was stained with wheat germ agglutinin (WGA) conjugated with ALEXA FUOR 488. To prepare a 1.0 mg/mL wheat germ agglutinin (WGA) conjugate stock solution 5.0 mg of lyophilized WGA conjugate were dissolved in 5.0 mL of PBS. The stock solution was diluted to 1.0 mg/mL by adding WGA conjugate working solution into Hank's

53 balanced salt solution (HBSS). 100  $\mu$ l of labeling solution was applied to each cover slip  
54 covering adhering cells. Samples were stained for 20 minutes at 20°C in the dark.  
55 Subsequently, excess solution was removed and biofilms were carefully washed twice with  
56 PBS. Excess liquid was removed, and cells were counterstained with freshly thawed 4',6-  
57 Diamidin-2-phenylindol (DAPI) working solution (1  $\mu$ g ml<sup>-1</sup>) for 15 minutes in the dark.  
58 Investigation of stained samples and control materials was carried out using a Leica TCS SP5.  
59 Wheat germ agglutinin (WGA) ALEXA FLUOR 488 was excited by the 495 nm laser line  
60 and emission was detected at 519 nm. DAPI was excited at 358 and emission recorded at 461  
61 nm. Both fluorescence signals were recorded using a sequential mode. The 488 nm laser line  
62 was also used for recording the reflected light channel (469 - 498 nm). Image analyses were  
63 carried out using Imaris software version 6.

64

#### 65 **Scanning electron microscopy (SEM)**

66 SEM imaging of *D. mediterraneus* biofilms were carried out using a Zeiss supra 50  
67 VP equipped with an energy dispersive X-ray spectrometer (EDAX). Sample preparation  
68 started with careful initial washing with PBS for 5 minutes. For fixation samples were  
69 immersed in 2.5% paraformaldehyde for 15 minutes. After washing in PBS, 2% osmium  
70 tetroxide in PBS was applied for 10 minutes. Samples were then carefully washed 3 times in  
71 purified water. Glass slides were then broken into smaller pieces and dried in a series of  
72 ethanol solutions. Subsequently, critical point drying removed remaining water. Biofilm  
73 bearing glass pieces were mounted on aluminum stubs using conductive carbon cement.  
74 Samples were stored in a desiccator overnight. Before imaging, samples were sputter coated  
75 with an 8 nm gold layer. Images were obtained with secondary electron detector applying an  
76 accelerating voltage of 4 kV with a working distance of 8.2 mm. For EDX analysis the  
77 acceleration voltage was increased to 5.6 kV (Figure DR1).

78

## 79     **Scanning Electron Microscopy with Cryogenic Preparation System (Cryo-SEM)**

80             Cryo-SEM observations of *D. mediterraneus* biofilms were carried out with a Hitachi  
81     4800s scanning electron microscope, equipped with a GARTAN GB cryo-unit. Biofilms on  
82     glass slides were cut and mounted on aluminum stubs with double sided sticking tape. Cryo-  
83     fixation of the samples was carried out by immersing the stub carefully into liquid nitrogen.  
84     Samples were then introduced into the cooled SEM. Images were obtained using a secondary  
85     electron detector, operated at acceleration voltage of 5 kV and 13.7 mm working distance.

## 87     **Electron microprobe analysis (EMP)**

88             For EMP analyses, *D. mediterraneus* biofilms were grown on sterile glass slides for 10  
89     days, as described above. Elemental analysis of the crystals in the biofilms was performed  
90     using a Jeol JXA-8200 WD/ED combined with a microanalyzer Superprobe. Prior to the  
91     analysis, samples were carefully washed 3 times in purified water and dried overnight. Before  
92     analyzing, samples were coated with a carbon layer of 10 nm thick. The Mg/Ca ratios of the  
93     crystal precipitates, listed in Table 2, represent the average value of 42 measurements of  
94     individual crystals within the biofilm.

## 96     **X-ray diffraction analysis (XRD)**

97     For mineralogy analysis of the crystal precipitates, 3 x 30 ml of active *D. mediterraneus*  
98     culture was inoculated into 3 x 1 sterile medium. Biofilm growth, pH, total alkalinity and  
99     sulfide concentration were monitored weekly. After 23 days, sulfide concentration exceeded  
100    11 mmol l<sup>-1</sup> and biofilm growth was stopped. The clear medium was carefully removed. The  
101    biofilm was resuspended with the last remaining 10 ml medium and transferred into a  
102    centrifuge tube. The suspension was centrifuged with 4500x g for 10 minutes at 4°C. The  
103    clear supernatant was discarded. The remaining pellet was resuspended in 50 ml of purified  
104    water with a pH of 8-9 to avoid dissolution of carbonate material. After resuspension, the

sample was centrifuged again. The clear supernatant was discarded and replaced by 50 ml of 1% NaClO to bleach organic material. The sample was left to react overnight followed by centrifuging and replacement of NaClO. In total, bleaching was repeated three times. The remaining material was washed 3 times in purified water and dried at 37°C. For XRD analyses, the material was powdered and placed on a silicon disc. Analyses were run from 0° to 60° 2-theta angle (Figure DR2) on a Philips X-ray diffractometer PW 1710 with monochromatic CuK $\alpha$ . The spectra showed additional peaks to those identified for dolomite. As great care was taken during the purification to avoid crystal dissolution due to extensive washing, additional peaks might originate from remnant medium components.

#### **Methods for element concentration and Ca isotope ratio measurements**

30 ml of active *D. mediterraneus* culture were inoculated into a Duran glass bottle with 1 l of sterile 196 medium with adjusted Mg/Ca ratio (see above). After 23 days of incubation, biofilm growth was stopped. The remaining medium was transferred step wise into acid-washed 50 ml centrifuge vials and centrifuged at 4500x g for 10 minutes. The clear supernatant was transferred into acid washed 50 ml centrifuge vials. The remaining pellet, containing floating organic material was washed four times in purified water with a pH of 8-9 (adjusted with NH $_4^+$ ). The supernatants of the washing steps were transferred separately into 50 ml acid washed centrifuge vials. The biofilm at the bottom was resuspended in 10 ml centrifuged medium and transferred into a 50 ml acid washed centrifuge vial. The sample was centrifuged at 4000 RPM for 10 minutes and transferred into a 15 ml Teflon beaker. 8 ml of ultra pure NaClO (1%) bleaching solution was added and left to react for 12 hours. Subsequently, the sample was centrifuged at 4000 RPM for 10 minutes and NaClO was exchanged. This procedure was repeated 3 times. After bleaching, the sample was washed 4 times in purified water with adjusted pH (see above) and the supernatants of individual

washing steps were transferred separately into 50 ml centrifuge vials. Finally, the remaining pellet was transferred into a 6 ml teflon beaker.

All samples were dried at 95°C for at least 12 hrs. Organic bearing samples and blanks were additionally resuspended in 1 ml purified water and 1 ml HNO<sub>3</sub> 8N and dried at 95°C, followed by resuspension in 1 ml HNO<sub>3</sub> and 20 µl HCLO<sub>4</sub> and left to react for 3 hours at 95°C. All applied HCl and HNO<sub>3</sub> based acids refer to 2-step Teflon cascade still (pico trace) purification of initially per analysis quality. After drying at 180°C 0.75 ml 8N HNO<sub>3</sub> and 0.25 ml H<sub>2</sub>O<sub>2</sub> were added and left to react for at least 12 hrs, and subsequently dried at 80°C.

In order to prepare source solutions for identical aliquots for different analytical methods and reproducibility tests the samples were re-dissolved in 4ml of 2.25 HNO<sub>3</sub>. Simultaneous determination of element concentration (Mg, Ca, Sr) and ratios by ICP-OES (VARIAN 720-ES) was carried out on 0.5 ml of the source solution. Aliquots of up to 3000 ng Ca equivalent were taken for Ca-isotope preparation and mixed with a <sup>43</sup>Ca/<sup>48</sup>Ca double spike. Spiked samples were dried at 95°C, resuspended in 2.2 N HNO<sub>3</sub>, and Ca was separated using 600 µl columns (biorad) with MCI-Gel 75-150 µm. Whole procedure blanks were spiked at the beginning and revealed maximum amounts of 197 ng for multi-step bleach runs (dolomite crystals) and 30 to 60 ng for routine column chemistry runs (single step total dissolution).

The calcium isotope ratios of dolomite crystals, aqueous Ca of initial and remaining medium, and Ca remaining in the biological component were measured with a Finnigan Triton TI (Thermal Ionization Mass Spectrometer) following the method described in [Heuser et al., \(2002\)](#) and [Böhm et al. \(2006\)](#). Prior to filament loading samples were dried down and transferred into chloride form by evaporation in 2.2 N HCl. After uptake with loading solution, aliquots of about 300 ng were loaded with TaCl<sub>5</sub> activator in a sandwich technique on a zone-refined Re filament.

Measurements were made on single filaments at temperatures around 1470 °C and a typical  $^{40}\text{Ca}$  signal intensity of 9-10 V. Data acquisition was performed in dynamic mode. The double-spike correction was carried out with the algorithm used by Heuser et al. (2002). The isotope values of Ca are reported as  $\delta^{44/40}\text{Ca}$  (‰) values relative to the NIST standard SRM915a, where  $\delta^{44/40}\text{Ca} = [({}^{44}\text{Ca}/{}^{40}\text{Ca})_{\text{sample}}/({}^{44}\text{Ca}/{}^{40}\text{Ca})_{\text{SRM915a}} - 1] \times 1000$ . For each sample at least 3 independent filaments were measured in one session and individually normalized to the average  $^{44}\text{Ca}/^{40}\text{Ca}$  of four SRM915a analyses, distributed throughout the same turret. The precision is expressed as two times the standard error of the average ( $2\text{SEM} = 2r/n^{0.5}$ ). Some samples were repeated in different sessions during the study. A representative external uncertainty for the method of at least 0.11‰ is reflected in the 2 SE for NIST-SRM-915a measurements throughout the study. The results are summarized in Table DR1.

Notes: (1) Some samples were reproduced better within their single session run than the standard used for normalization regarded throughout the whole study.

(2) The last two washing supernatant liquids for the organic component had an isotopic fractionation similar to the corresponding total dissolved sample. This result shows that the intermediate fractionation of the organic material is not due to artifacts during sample preparation, but represents the original Ca isotopic fractionation of this component.

(3) The isotope signature of the whole procedure blank was heavier than all samples. Therefore, its only potential influence was a shift towards apparent heavier signatures, which would be mostly expressed in the smallest and multistep bleached samples, the dolomite crystals. Consequently, after blank correction original crystal isotope signature pointed to even lighter values. The fractionation step between the divalent cation reservoir, attached to the organic phase, and the dolomite precipitate must be assumed to be even larger than reflected in these initial measurements.

180 Figure caption:

181 Figure DR1: Scanning electron microscopy images of Mg-rich dolomite in *D. mediterraneus*

182 biofilm. A: Spheroidal dolomite nanocrystals (~50-200 nm) embedded in EPS were visible

183 after 3 days of biofilm growth. B: After 14 days, larger crystals were observed within the

184 biofilm. EDX spot analysis indicates the relative abundance of Mg and Ca in the crystals

185 (Crystal) with respect to the bacterium (Cell). The prominent peak for silicon (Si) is caused by

186 the glass slide the biofilm was grown on. Note: Due to de-hydration during sample

187 preparation the EPS was compressed and crystals might not be located in their original

188 position.

189

190 Figure DR2: X-ray diffractograms of reference dolomite material and dolomite crystals

191 formed in *D. mediterraneus* biofilms at 21°C (sample SK0101, sample SK0120). Note: The

192 presence of superstructure reflections (odd labeled hkl's) indicates that the rhombohedral

193 carbonate is an ordered dolomite (Reeder, 1983).



# References

- Böhm, F., Gussone, N., Eisenhauer, A., Dullo, W.-C., Reynaud, S., and Paytan, A., 2006, Calcium isotope fractionation in modern scleractinian corals: *Geochimica et Cosmochimica Acta*, v. 70, p. 4452-4462.
- Heuser, A., Eisenhauer, A., Gussone, N., Bock, B., Hansen, B.T., and Nägler, T.F., 2002, Measurement of calcium isotopes ( $\delta^{44}\text{Ca}$ ) using a multicollector TIMS technique: *INTERNATIONAL JOURNAL OF MASS SPECTROMETRY*, v. 220, p. 387-399.
- Reeder, R.J., 1983, Crystal chemistry of the rhombohedral carbonates, *in* R.J., R., ed., *Carbonates*, Volume 11, p. 1-47.
- Sass, A., Rutters, H., Cypionka, H., and Sass, H., 2002, *Desulfobulbus mediterraneus* sp nov., a sulfate-reducing bacterium growing on mono- and disaccharides: *Archives of Microbiology*, v. 177, p. 468-474.
- Zeebe, R.E.W.-G., D., 2007, *CO2 IN SEAWATER: EQUILIBRIUM; KINETICS; ISOTOPES*: Amsterdam, Boston, London, New York, Oxford, Paris, San Diego, San Francisco, Singapore, Sydney, Elsevier.

Figure DR1.

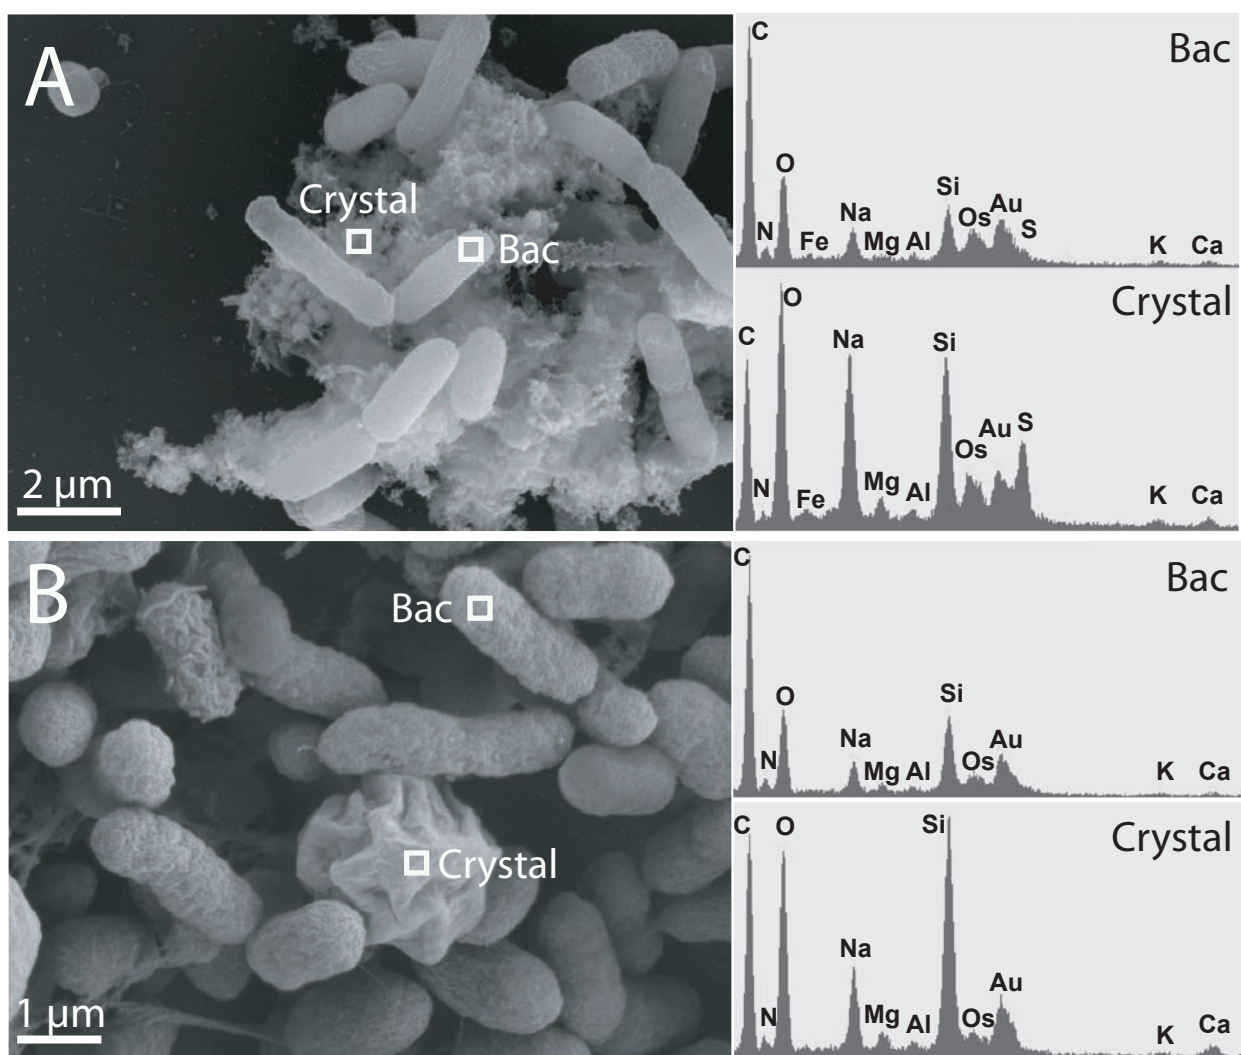

Figure DR2.

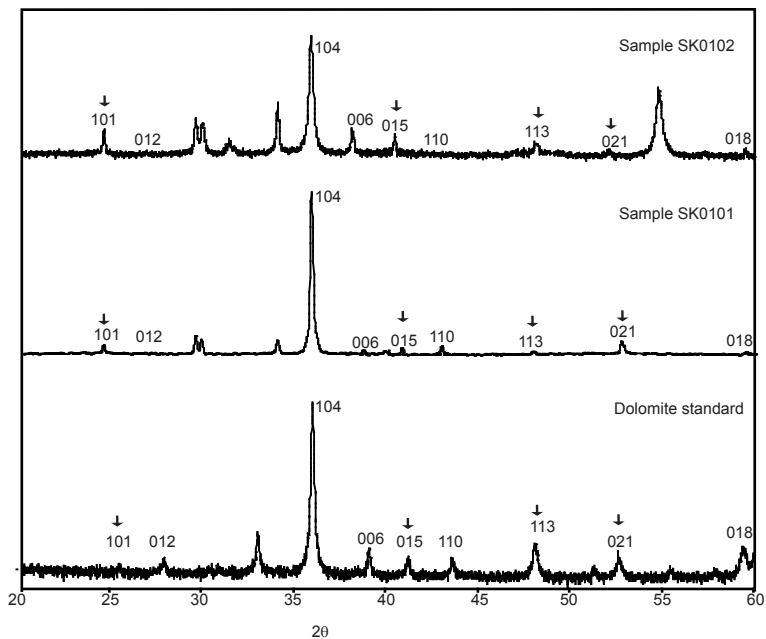

TABLE DR1. Ca ISOTOPY OF MEDIUM, ORGANIC COMPONENT AND CRYSTALS

| Sample                 | Average $\delta^{44/40}\text{Ca}$ (‰) | 2 SE | n |
|------------------------|---------------------------------------|------|---|
| Standard NIST-SRM-915a | 0.00                                  | 0.11 | 8 |
| Whole procedure blank  | 1.16                                  | 0.38 | 2 |
| Chemistry blank        | 1.24                                  | 0.03 | 2 |
| Initial medium         | 0.95                                  | 0.05 | 3 |
| Remaining medium       | 1.10                                  | 0.12 | 6 |
| Organic (EPS+Bacteria) | 0.48                                  | 0.07 | 6 |
| 3rd wash Organic       | 0.46                                  | 0.08 | 5 |
| 4th wash Organic       | 0.48                                  | 0.26 | 3 |
| Dolomite crystals      | 0.05                                  | 0.24 | 3 |
